# Supplementary material for: Globally distributed bacteriophage genomes reveal mechanisms of tripartite phage–bacteria–coral interactions
Source: PubMed Central journal article supplement (PMC11309003; doi:10.1093/ismejo/wrae132), 2024-07-20

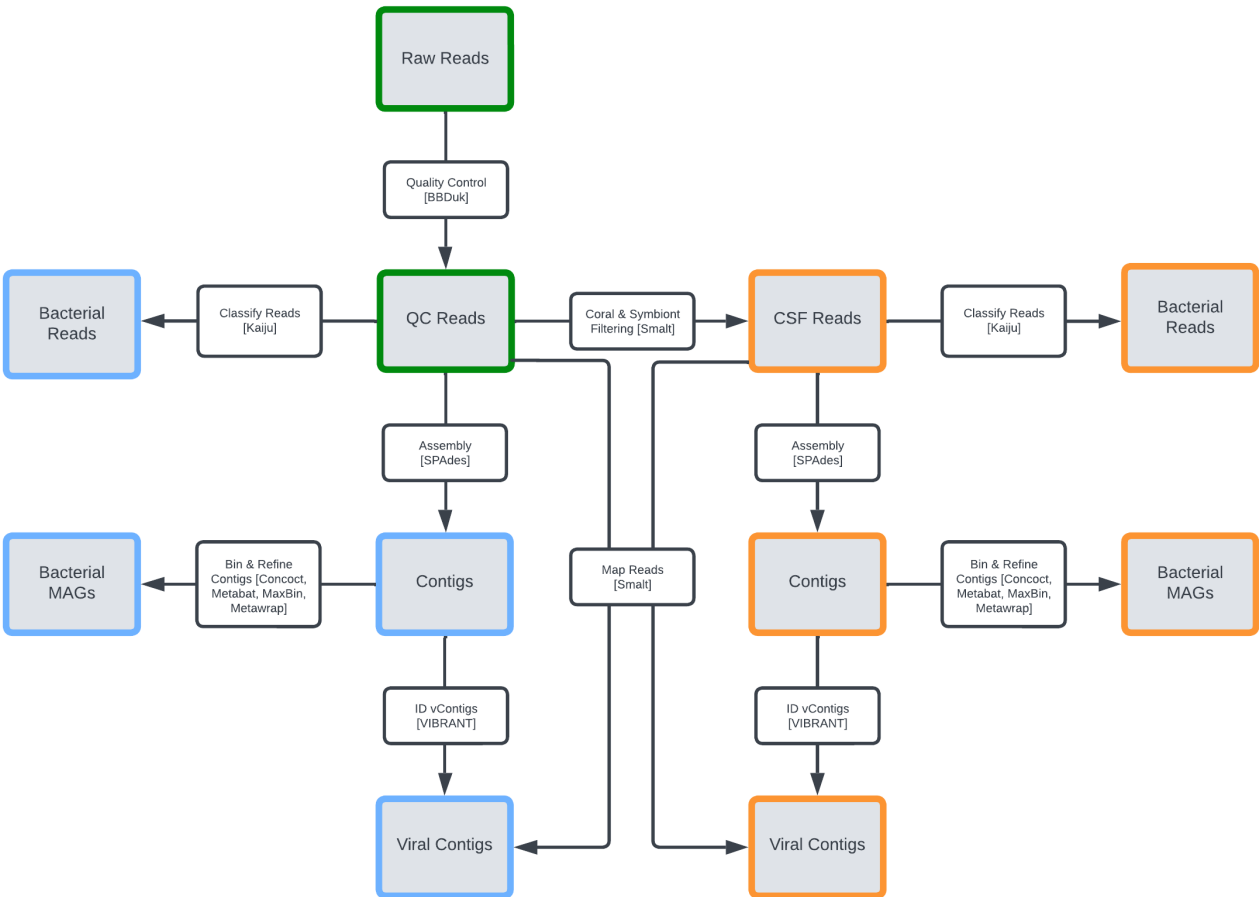

Supplement: wallace_2024_figs1_resub_wrae132.pdf [file wallace_2024_figs1_resub_wrae132.pdf]
